# Supplementary material for: The mammalian LINC complex component SUN1 regulates muscle regeneration by modulating drosha activity
Source: eLife journal article supplement (doi:10.7554/elife.49485), 2019-11-05
Supplement: supp [file elife_poa_e49485_Figure_1_figure_supplement_1.pdf › elife_poa_e49485_Figure_1_figure_supplement_1.pdf]

Figure 1 figure supplement 1

|                                                                                     |                   |
|-------------------------------------------------------------------------------------|-------------------|
| MDFSRLHTYTPICCVFENTCYTYALSSSYSSDALDFETEHKLEPMFDSPRMSRRSLRLVTTTASYSSCDSCAI DSHI STSR | 80                |
| MDFSRLHTYSPFCVPCVNTCYTYALSSSYSSDALDFETEHKLEPMFDSPRMSRRSLRLVTTTASYSSCDSCAI DSHI STSR | 79                |
| ATPAKGRERTRIMVKRRSASKPAHSINLSGKGLSSSTSHDSSQSLRSATVDRHFMVDESUIRECIKVDHFWCDDDCDLK     | 160               |
| AVSLKNRAARITTKRRSTNKSASHSINVSQRQTSSGVSLGGTVSLQDAVTRPPFVDESUIRECIKVDHFWCDDDCDLK      | 159               |
| CGNKAATCCNCELAEVASSINCYTORDORMISARTDALTAFSAIHCTTSRVYSRDRTLKPRGVSFYLDRTLWLAKSTSS     | 239               |
| CGNKAATCCNCDVGAAATAHNCFSSNSCMSLSEKDVLTIAHPAAPCPVSRVYSRDRNQR-----                    | 219               |
| SFASFI VQLFQVVLMKLNFETYKLKGYESRAYESQSYETKSHESAHLGHCGRMTAGELSRVDGESLCDDCKGKKHLEI H   | 319               |
| -----                                                                               | 219               |
| TATHSQLPQPHRVAGAMGRLLIYTGDLLVCAI LRRTRAAQMSVAEAVVSMVLVAVSAFCKAASCTFWWLCSCWYCFMILLIS | 399               |
| -----CYF-----LLCI LRRIGAVCQAVSRTAVSALVAVVAVFCKAASCVFWWLCI CWYCFMILLIS               | 275               |
| VLVNVLITTRCLRNIQKVFVLLPLPLLLGACVSLMCCGNHFSLLPVLNVTAHQPTICRMDDSKGMHREGPLPPSPFPKVDH   | 479               |
| VLVNVLITTRCLRNIQKFLVLLPLPLLLGACVSLMCCGNHFSLLPVLNVTAHQPTICRMDDPQDVFKPTTSRLKQLQGD     | 354               |
| KASQWQESDMGCKVASISACQCNFDERLAELIVLLCKLCIRVDCVDDCRECQSLVWKNVVCCHLQEMGTI EPHDAKIDF    | 559               |
| EAFPWVHWSGVEQCVASISGCGHFGENLRELITLLCKLCARVDCMEGCAACPSASVRDAVGC-----PREIDF           | 424               |
| MTTHFDHEVRLSNLEDMVRKLTTEKSEATCKELEETKQKAGSRDEECPLLDREVQLELEELNLLKSQLSDVQLEKUSOEQAG  | 639               |
| MAHFOEHEVRLSHLEETLGKIREKSEATCKELEETKQKTI SAVGECLLPTVERLOLELDQKSELSSVREVKIGOETVD     | 503               |
| A-----RI QETVQLMFSSEDCCCCSLEMLLEKLSSRFVSKDELQVLLHDLLEKLQNLTHFTVIGCAPUSEATMSAVN      | 712               |
| AVQERVVDVQVREMKLLFSSEDCCCCSLEQLQRFSSQFVSKGDLCTMRDLQLQLLRNVITFVSVIKCLPISEAVVSAVS     | 583               |
| CACISCTTEACAHILVNNALKLYSCDKTCMDFALESCCGSILSTROSEIYEIKUALLSLFCVPLWYFSCSPRVVICPDI     | 792               |
| EACASCTTEACARAIVNSALKLYSCDKTCMDFALESCCGSILSTROSEIYEIKUALMSLFCI PLWYFSCSPRVVICPDI    | 663               |
| YPCNWAFFKCSCCYLVMRLSMKIYPTTFIMEHLPKTLSPTCNISSAPKDFAVYCLETEYCEEECCPLCRFTYDCDCDSLCM   | 872               |
| YPCNWAFFKCSCCYLVMRLSMMHPAAFTLEHLPKTLSPTCNISSAPKDFAVYCLENEYCEEECCPLCRFTYDCDCDSLCM    | 743               |
| FHTLERFDQAFQIVELRVL SNVGFPEYITOLYRFRVHCEPIQ.                                        | Mus SUN1.pro 914  |
| EQALKRFDQAFQIVELRI FSNVGFPEYITOLYRFRVHCEPVK                                         | Homo SUN1.pro 785 |
