# Supplementary material for: The mammalian LINC complex component SUN1 regulates muscle regeneration by modulating drosha activity
Source: eLife journal article supplement (doi:10.7554/elife.49485), 2019-11-05

**Figure 2 figure supplement 1**

Myofiber regeneration numbers do not differ between reciprocal grafts

Reciprocal graft transplantation at day 9 post surgery

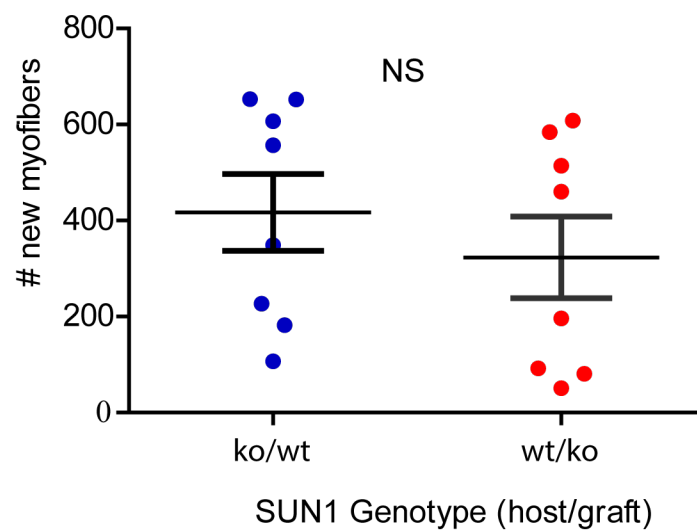

Supplement: supp [file elife_poa_e49485_Figure_2_figure_supplement_1.pdf › elife_poa_e49485_Figure_2_figure_supplement_1.pdf]
