# Supplementary material for: The mammalian LINC complex component SUN1 regulates muscle regeneration by modulating drosha activity
Source: eLife journal article supplement (doi:10.7554/elife.49485), 2019-11-05
Supplement: supp [file elife_poa_e49485_Figure_4_figure_supplement_1.pdf › elife_poa_e49485_Figure_4_figure_supplement_1.pdf]

Figure 4 figure supplement 1

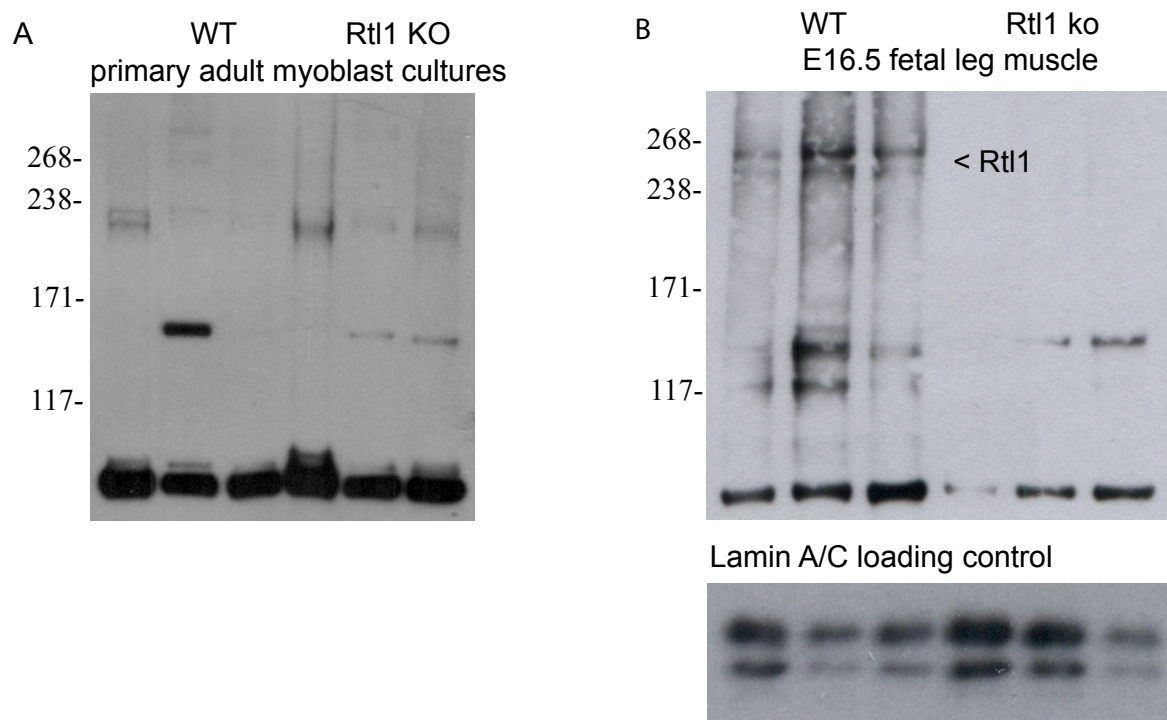

Table: RTL1 expression (qPCR CT values with 25ng total RNA-reverse transcription)

| Fetal stage                  | Muscle regeneration     |           | In vitro                                                    |
|------------------------------|-------------------------|-----------|-------------------------------------------------------------|
| E14.5-<br>E17.5 fetal<br>leg | muscle<br>graft<br>day5 | mdx day24 | primary<br>myoblast<br>(derived<br>from<br>adult<br>muscle) |
| 23-24                        | 26-27                   | 25-26     | 30-32                                                       |
