# Supplementary material for: The mammalian LINC complex component SUN1 regulates muscle regeneration by modulating drosha activity
Source: eLife journal article supplement (doi:10.7554/elife.49485), 2019-11-05

**Figure 6 figure supplement 1**

Expression levels of other imprinted genes at the *Dlk-Dio3* cluster are not affected by the loss of SUN1  
No change in *Dlk1* and *Meg3* expression levels during muscle regeneration

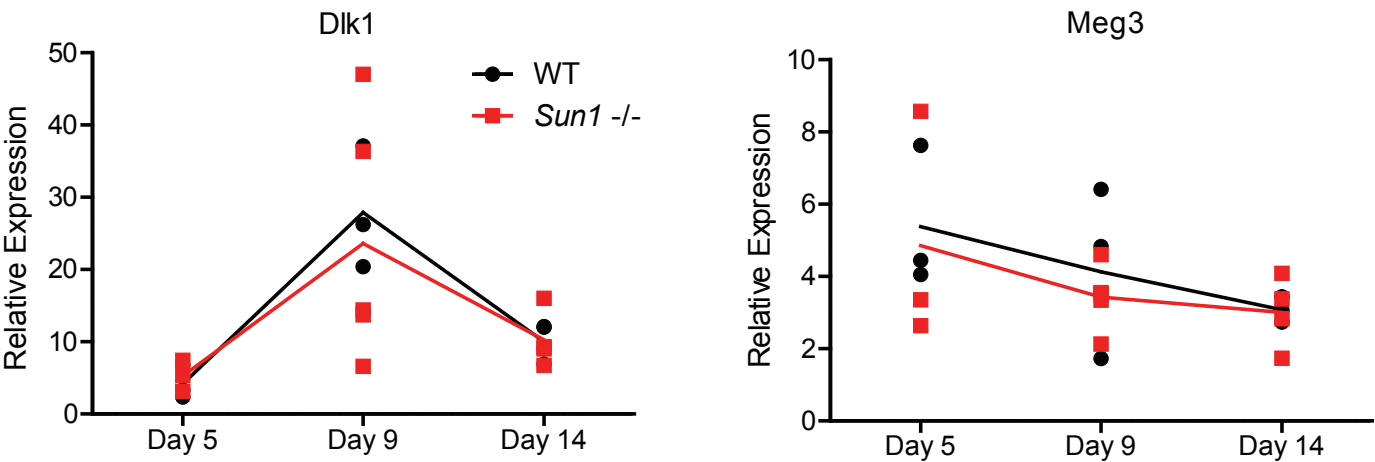

Supplement: supp [file elife_poa_e49485_Figure_6_figure_supplement_1.pdf › elife_poa_e49485_Figure_6_figure_supplement_1.pdf]
