# Supplementary material for: The mammalian LINC complex component SUN1 regulates muscle regeneration by modulating drosha activity
Source: eLife journal article supplement (doi:10.7554/elife.49485), 2019-11-05

Figure 7 Supplement Figure 1

Expression levels of miR-127-3p in biopsy samples from patients with *LMNA* induced muscular dystrophy.

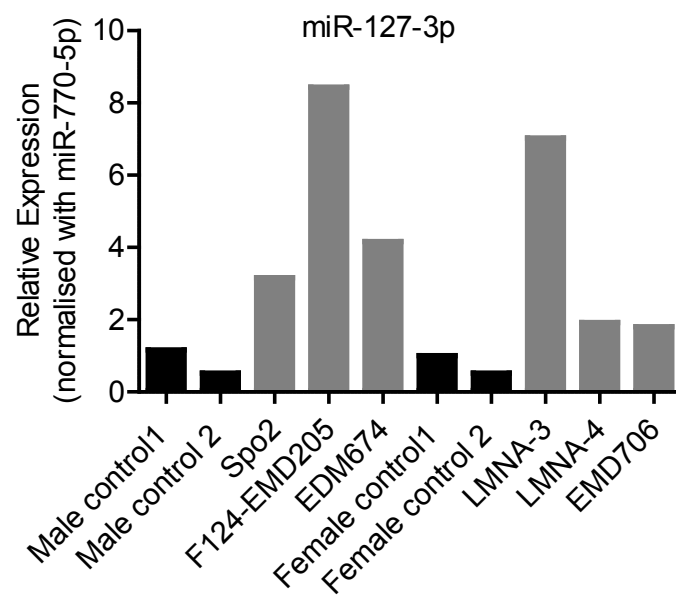

Supplement: supp [file elife_poa_e49485_Figure_7_figure_supplement_1.pdf › elife_poa_e49485_Figure_7_figure_supplement_1.pdf]
