# Supplementary figures and images for: The mammalian LINC complex component SUN1 regulates muscle regeneration by modulating drosha activity
Source: eLife journal article supplement (doi:10.7554/elife.49485), 2019-11-05

Figure 2 figure supplement 2

SUN1 expression in differentiating myoblasts *in vitro*

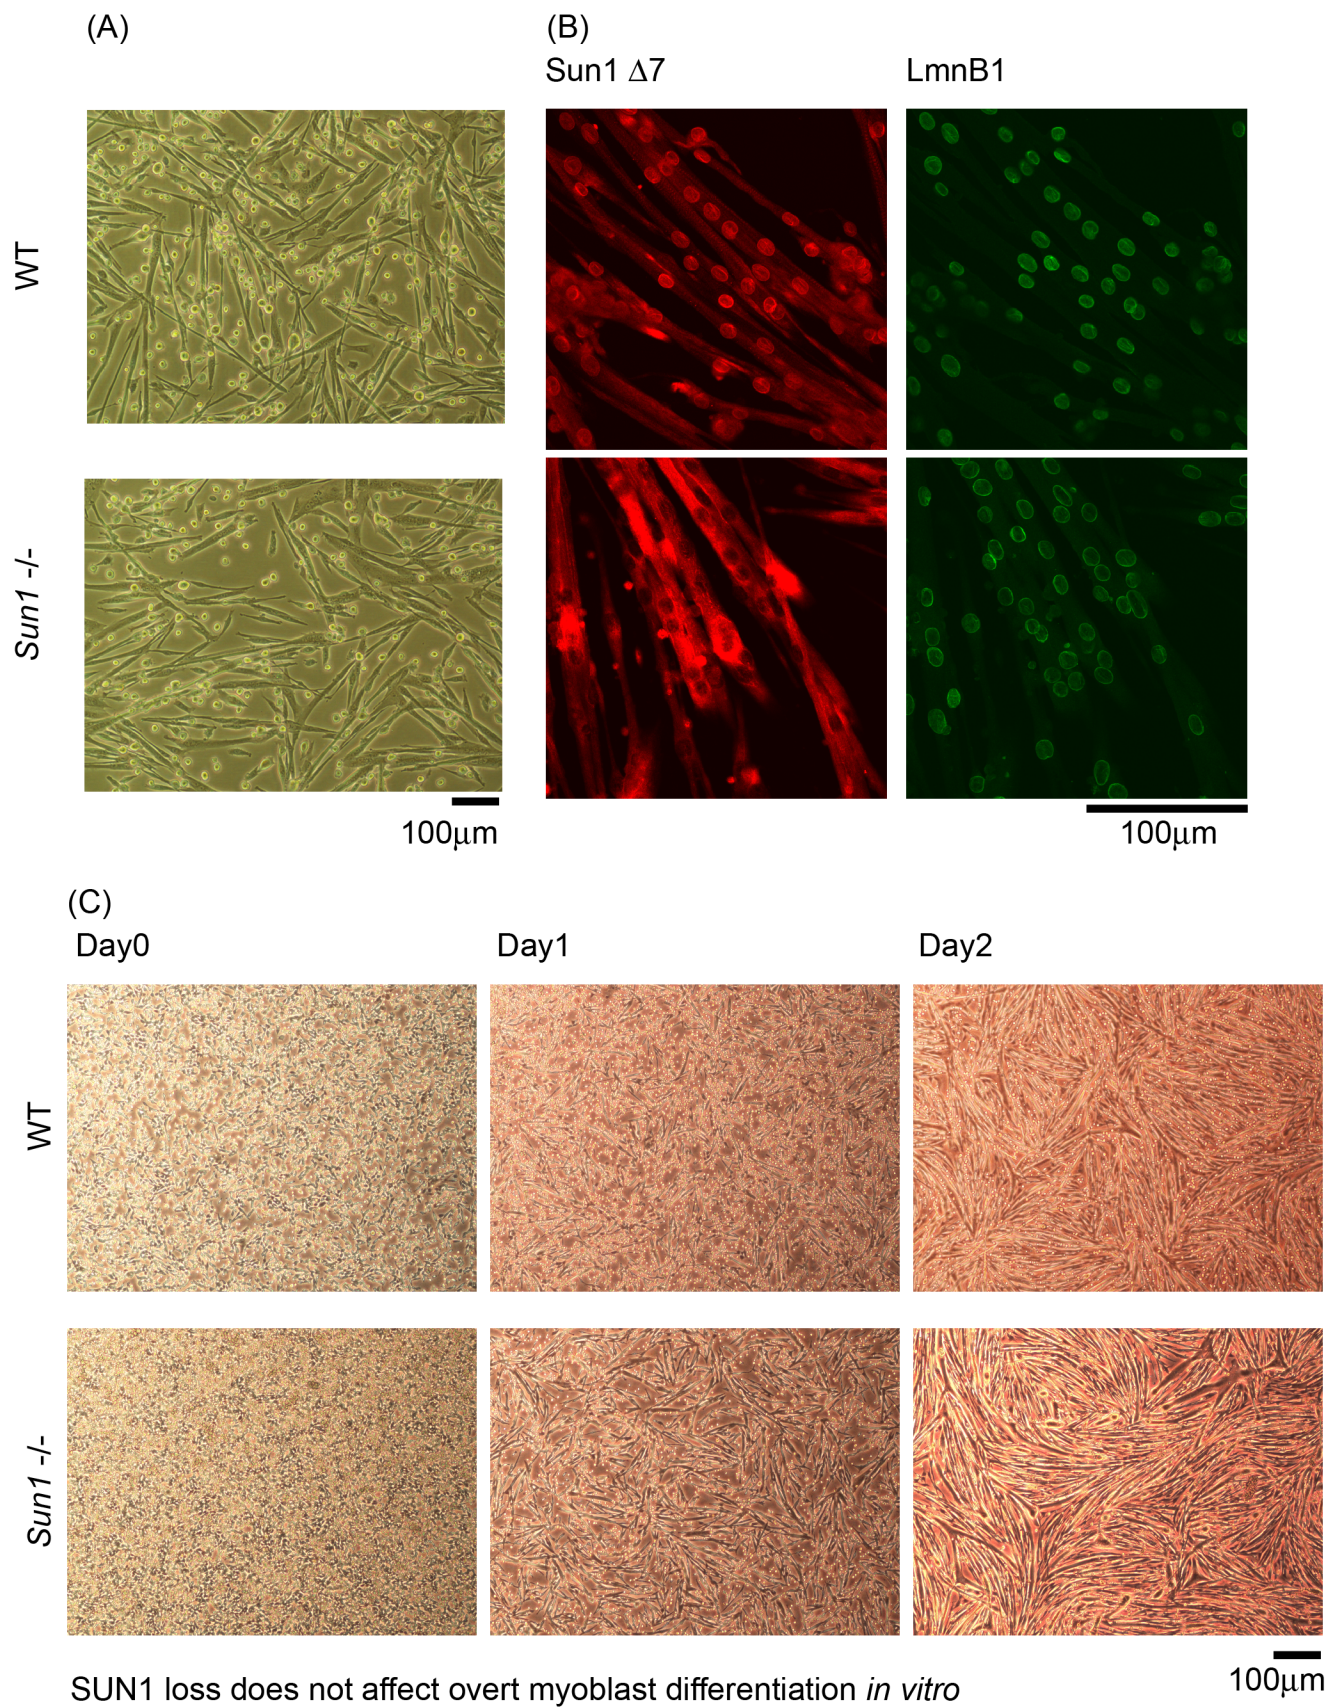

Supplement: supp [file elife_poa_e49485_Figure_2_figure_supplement_2.pdf › elife_poa_e49485_Figure_2_figure_supplement_2.pdf]
